# Supplementary material for: Effect of Dietary Glycemic Index on β-Cell Function in Prediabetes: A Randomized Controlled Feeding Study
Source: MDPI journal article supplement (doi:10.3390/nu14040887), 2022-02-19
Supplement: s1 [file s1]

**Figure S1: CONSORT Flow Diagram**

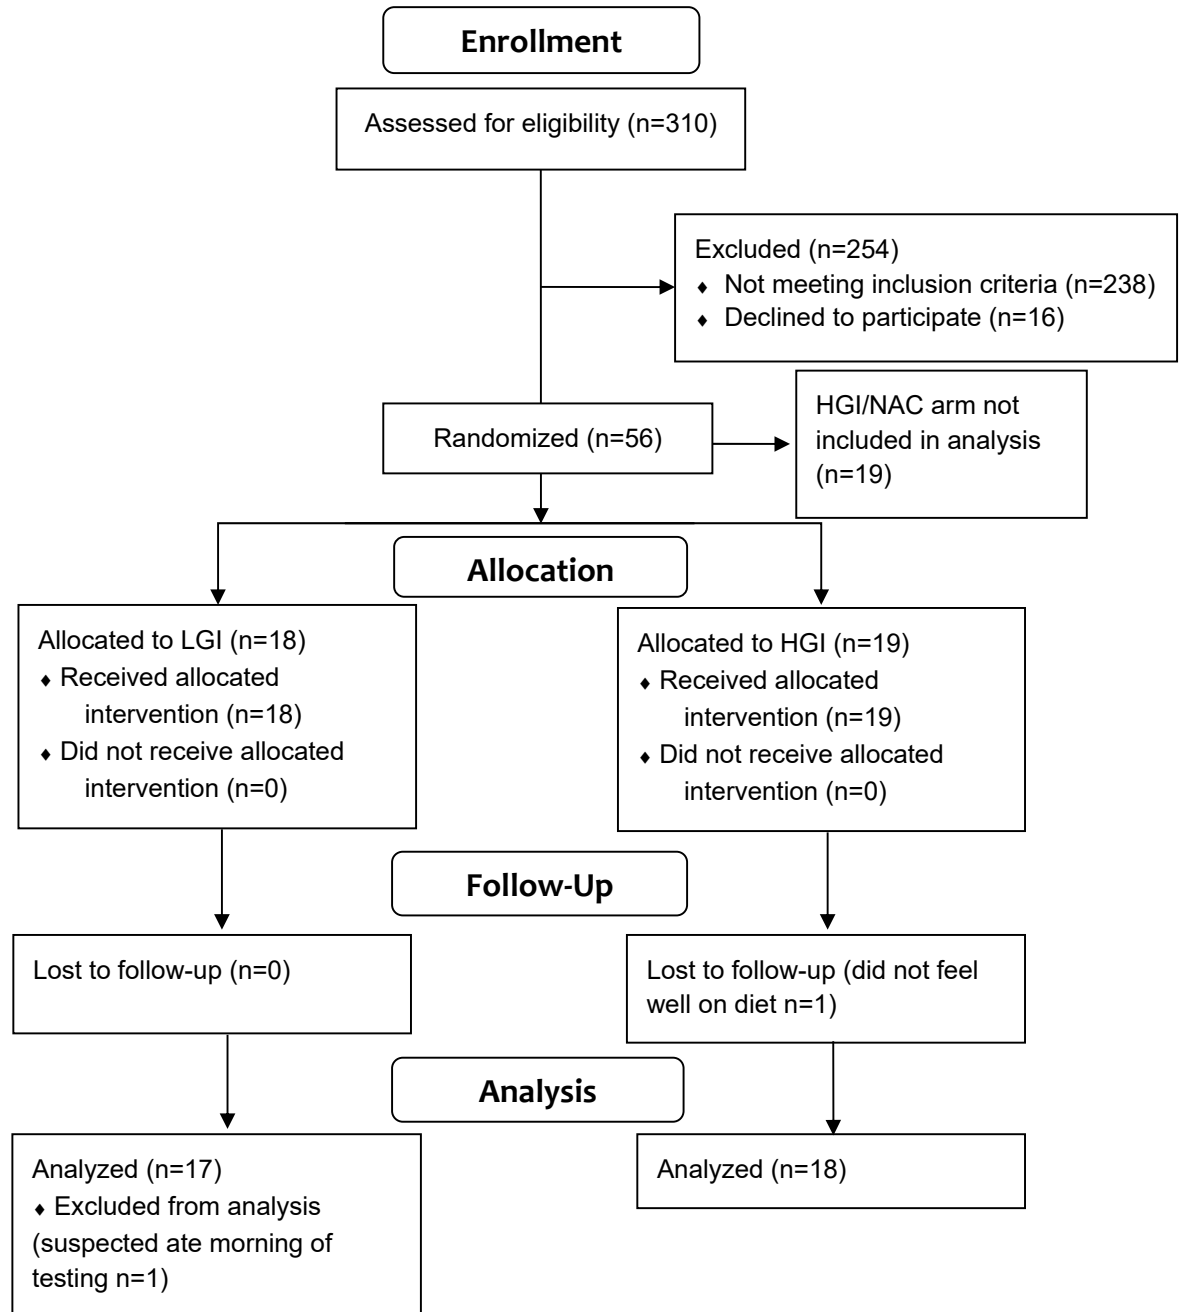

Supplemental Table S1. Meal Test Composition by Diet

| Control Diet                               |            |               |              |              |              |                      |                |
|--------------------------------------------|------------|---------------|--------------|--------------|--------------|----------------------|----------------|
| Food Description                           | Grams      | Energy (kcal) | Protein (%)  | Fat (%)      | Carb (%)     | Fiber, total dietary | Glycemic Index |
| Rice, brown, long-grain, cooked            | 240        | 266.4         | 9.36         | 7.35         | 83.29        | 4.32                 | 55             |
| DGI Chili base (Sat. night)                | 120        | 37.2          | 11.4         | 26.77        | 61.84        | 1.45                 | 23             |
| Beef, ground, 90%10% fat, crumbles, cooked | 46         | 105.8         | 51.22        | 48.78        | 0            | 0                    | -              |
| Oil, canola                                | 9          | 79.56         | 0            | 100          | 0            | 0                    | -              |
| Orange juice, unsweetened                  | 125        | 56.25         | 5.86         | 1.16         | 92.97        | 0.25                 | 50             |
|                                            |            |               |              |              |              |                      |                |
| <b>Meal Totals</b>                         | <b>540</b> | <b>545.21</b> | <b>15.57</b> | <b>29.61</b> | <b>54.82</b> | <b>6.02</b>          |                |
| LGI Diet                                   |            |               |              |              |              |                      |                |
| Food Description                           | Grams      | Energy (kcal) | Protein (%)  | Fat (%)      | Carb (%)     | Fiber, total dietary | Glycemic Index |
| Beans, kidney, cooked                      | 120        | 152.4         | 26.6         | 3.45         | 69.95        | 7.68                 | 23             |
| DGI Chili base (Sat. night)                | 120        | 37.2          | 11.4         | 26.77        | 61.84        | 1.45                 | 23             |
| Tortillas, flour                           | 52         | 162.24        | 10.76        | 22.62        | 66.62        | 1.61                 | 30             |
| Beef, ground, 90%10% fat, crumbles, cooked | 20         | 46            | 51.22        | 48.78        | 0            | 0                    | -              |
| Butter, salted                             | 1          | 7.17          | 0.46         | 99.5         | 0.03         | 0                    | -              |
| Oil, canola                                | 9          | 79.56         | 0            | 100          | 0            | 0                    | -              |
| Apple juice,                               | 130        | 59.8          | 0.86         | 2.5          | 96.64        | 0.26                 | 40             |

|                                                                 |              |                      |                    |                |                 |                             |                       |
|-----------------------------------------------------------------|--------------|----------------------|--------------------|----------------|-----------------|-----------------------------|-----------------------|
| unsweetened                                                     |              |                      |                    |                |                 |                             |                       |
| <b>Meal Totals</b>                                              | <b>452</b>   | <b>544.37</b>        | <b>15.74</b>       | <b>29.76</b>   | <b>54.49</b>    | <b>11.01</b>                |                       |
|                                                                 |              |                      |                    |                |                 |                             |                       |
| <b>HGI Diet</b>                                                 |              |                      |                    |                |                 |                             |                       |
| <b>Food Description</b>                                         | <b>Grams</b> | <b>Energy (kcal)</b> | <b>Protein (%)</b> | <b>Fat (%)</b> | <b>Carb (%)</b> | <b>Fiber, total dietary</b> | <b>Glycemic Index</b> |
| Rice, white, long-grain, regular, cooked, unenriched, with salt | 140          | 182                  | 8.54               | 2              | 89.46           | 0.56                        | 109                   |
| DGI Chili base (Sat. night)                                     | 100          | 31                   | 11.4               | 26.77          | 61.84           | 1.21                        | 23                    |
| Tortillas, corn                                                 | 28           | 61.04                | 10.04              | 11.3           | 78.66           | 1.76                        | 52                    |
| Beef, ground, 90%10% fat, crumbles, cooked                      | 51           | 117.3                | 51.22              | 48.78          | 0               | 0                           | -                     |
| Oil, canola                                                     | 9.5          | 83.98                | 0                  | 100            | 0               | 0                           | -                     |
| Cranberry juice cocktail, bottled                               | 132          | 71.28                | 0                  | 1.64           | 98.36           | 0                           | 68                    |
| <b>Meal Totals</b>                                              | <b>460.5</b> | <b>546.6</b>         | <b>15.28</b>       | <b>29.66</b>   | <b>55.06</b>    | <b>3.54</b>                 |                       |
